# Supplementary material
Source: HighWire-hosted journal article supplement (https://bmjopen.bmj.com/content/11/9/e045431)
Supplement: inline-supplementary-material-2 [file inline-supplementary-material-2.pdf]

## Additional file 2.

## Overview characteristics included articles

| Author                        | N                           | Age (range, mean, SD) <sup>1</sup> | Gender                | Exclusion                                                                                                                                     | Inclusion                                                                                                                                                                                                                                                                                             | Follow up in months | Included instrument <sup>2</sup> |
|-------------------------------|-----------------------------|------------------------------------|-----------------------|-----------------------------------------------------------------------------------------------------------------------------------------------|-------------------------------------------------------------------------------------------------------------------------------------------------------------------------------------------------------------------------------------------------------------------------------------------------------|---------------------|----------------------------------|
| Alexandre et al., 2012 [30]   | 60                          | ≥60 (60-82)                        | 29 men/<br>31 women   | PD, history of transitory ischemic attack, stroke, cognitive impairment, wheelchair, fall in the previous 6 months                            | n.a.                                                                                                                                                                                                                                                                                                  | 12 months           | TUG test                         |
| Bizovska et al., 2018 [49]    | 131                         | ≥60 (mean 70.8, SD 6.7)            | 23 men/<br>108 women  | Any injury or surgery on the musculoskeletal system during the last two years before the baseline measurement                                 | Aged ≥60; ii) no known neurological or musculoskeletal problem that may affect gait or balance abilities; iii) ability to stand and walk without any assistance and assisting device                                                                                                                  | 12 months           | POMA-B<br>POMA-G                 |
| Bongers et al., 2015 [44]     | 352                         | ≥70 (mean 76.2 (SD 4.3)            | all women             | too ill to be screened by GP, currently receiving treatment from geriatrician or received comprehensive geriatric assessment in past 3 months | n.a.                                                                                                                                                                                                                                                                                                  | 12 months           | Gait speed test (4m)             |
| Bongue et al., 2011 [31]      | 1759                        | ≥65 (65-95, 70.7 (SD 4.6))         | 862 men/<br>897 women | neurological disease, cognitive impairment, unable to understand French or follow simple commands                                             | n.a.                                                                                                                                                                                                                                                                                                  | 12 months           | TUG test                         |
| Chow et al., 2019 [43]        | 192                         | ≥65 (mean: 74.4)                   | 81 men/<br>111 women  | n.a.                                                                                                                                          | aged ≥65, being discharged from the ED, English speaking, had capacity to give consent, and personally identified a risk factor for falling (if a patient reported that they had either fallen in the last year, worried about falling, or admitted that they felt unsteady when standing or walking) | 6 months            | TUG test                         |
| Coll-Planas et al., 2006 [52] | 192 (268 with 76 drop-outs) | ≥65 (89 >83 years, 103 ≤83 years)  | 34 men/<br>158 women  | living in nursing home                                                                                                                        | Community dwelling elderly aged ≥65                                                                                                                                                                                                                                                                   | 12 months           | Fall history                     |
| Ersoy et al., 2009 [48]       | 125                         | ≥50 (50-79, 61.4 (SD 7.9)          | all women             | unable to walk without assistance or aids                                                                                                     | postmenopausal community dwelling women aged 50+                                                                                                                                                                                                                                                      | 6 months            | BBS                              |

|                            |                |                              |                       |                                                                                                                                                                                                                                                                                                                                                            |                                                                                                  |                     |                                  |
|----------------------------|----------------|------------------------------|-----------------------|------------------------------------------------------------------------------------------------------------------------------------------------------------------------------------------------------------------------------------------------------------------------------------------------------------------------------------------------------------|--------------------------------------------------------------------------------------------------|---------------------|----------------------------------|
| Faber et al., 2006 [50]    | 72 (total 245) | 84.9 (SD 6.0) (of total 245) | 14 men/<br>58 women   | in ability to walk 6m with(out) aids, capacity to understand instructions, medical contraindications to participate, cognitive impairment                                                                                                                                                                                                                  | n.a.                                                                                             | 10 months           | POMA-B<br>POMA-G                 |
| Gerdhem et al., 2005 [53]  | 984            | 75 (75.01-75.99)             | all women             | n.a.                                                                                                                                                                                                                                                                                                                                                       | community dwelling women aged 75 in Malmö                                                        | 12 months           | Fall history                     |
| Hofheinz et al., 2016 [32] | 120            | ≥60 (60-87, 72.2 (SD 6.8)    | 26 men/<br>94 women   | cognitive limitations, neurological or musculoskeletal diagnose                                                                                                                                                                                                                                                                                            | able to walk 10m with(out) aid, able to understand instructions, able to carry glass in one hand | 12 months           | TUG test                         |
| Kang et al., 2017 [34]     | 541            | ≥60 (67.4 (SD 5.6))          | 234 men/<br>307 women | Inability to perform the basic activities of daily living and thus could not complete performance-based assessments; visual impairments; current use of drugs (psychotropic drugs, cardiovascular drugs, hypoglycemic agents, non-steroidal anti-inflammatory drugs, analgesics, dopaminergic drugs, PD's drugs or more than four kinds of complex drugs). | Aged ≥60 years and joined the China's national free physical examination programs                | 12 months           | TUG test<br>Gait speed test (4m) |
| Kang et al., 2018 [33]     | 619            | ≥60 (60-86, 67.4 (SD 5.6))   | 262 men/<br>357 women | Severe functional impairment, current use of sedative drugs, antiepileptic drugs and so on, refusal to participate in the follow-up of this study                                                                                                                                                                                                          | Aged ≥60, who joined the free physical examination program                                       | 12 months           | TUG test                         |
| Kojima et al., 2015 [35]   | 259            | ≥65 (72.6 (SD 5.9)           | 95 men/<br>164 women  | ≥3 falls in past year, unstable medical conditions, already exercising 150min/week                                                                                                                                                                                                                                                                         | aged ≥65 able to walk independently and participate in group exercise                            | 6 months (24 weeks) | TUG test                         |
| Lin et al., 2004 [36]      | 1200           | ≥65 (73.4 (SD=NR)            | 709 men/<br>491 women | NR                                                                                                                                                                                                                                                                                                                                                         | NR                                                                                               | 12 months           | TUG test<br>FR test              |
| Lindeman et al., 2008 [54] | 65             | ≥65 (67.7 (SD 6.0))          | 33 men/<br>32 women   | use of walking aid, self-reported neurological disorders, or spinal or lower extremity joint pain interacting with stepping performance, inability to come to the research department without help, cognitive impairment                                                                                                                                   | community dwelling elderly aged ≥65                                                              | 12 months           | Fall history                     |

|                                |     |                             |                      |                                                                                                                                                                                                                                                                                                                                                                                                                                                                                        |                                                                                                                                                                                                                                                                                                                                                                    |                     |                 |
|--------------------------------|-----|-----------------------------|----------------------|----------------------------------------------------------------------------------------------------------------------------------------------------------------------------------------------------------------------------------------------------------------------------------------------------------------------------------------------------------------------------------------------------------------------------------------------------------------------------------------|--------------------------------------------------------------------------------------------------------------------------------------------------------------------------------------------------------------------------------------------------------------------------------------------------------------------------------------------------------------------|---------------------|-----------------|
| Melzer et al., 2010 [37]       | 98  | ≥65 (65-91, 78.4 (SD 5.7))  | 26 men/<br>72 women  | serious visual impairment; inability to ambulate independently; cognitive impairment; severe focal muscle weakness or paralysis; severe peripheral or compression/entrapment neuropathies; symptomatic orthostatic hypotension, respiratory, cardiovascular, musculoskeletal or neurological disorders that might have interfered with participation in the exercise program; cancer, metastatic or under active treatment; and use of medication known to impair balance or strength. | n.a.                                                                                                                                                                                                                                                                                                                                                               | 12 months           | TUG test<br>BBS |
| Muir et al., 2008 [47]         | 187 | ≥47 (47-90, 79.4 (SD 5.83)) | 122 men/<br>65 women | n.a.                                                                                                                                                                                                                                                                                                                                                                                                                                                                                   | community dwelling veterans of WWII and the Korean War residing in 3 regions of southwestern Ontario                                                                                                                                                                                                                                                               | 12 months           | BBS             |
| Murphy et al., 2003 [51]       | 50  | ≥60 (72.3 (SD 8.6))         | 13 men/<br>37 women  | no exclusion based on disease                                                                                                                                                                                                                                                                                                                                                                                                                                                          | community dwelling elderly aged ≥60                                                                                                                                                                                                                                                                                                                                | 14 months           | FR test         |
| Nitz et al., 2013 [55]         | 449 | ≥40 (40-80, 59.3 (SD 10.6)) | all women            | n.a.                                                                                                                                                                                                                                                                                                                                                                                                                                                                                   | independently mobile and cognitively competent women from the electoral rool in North Brisbane Health district                                                                                                                                                                                                                                                     | 108 months (9 year) | Fall history    |
| Olsen Möller et al., 2012 [38] | 153 | ≥65 (66-94, 81.5 (SD 6.3))  | 51 men/<br>102 women | n.a.                                                                                                                                                                                                                                                                                                                                                                                                                                                                                   | Age ≥65, living in the municipality where the study was conducted; needing help with at least two activities of daily living (ADL); admitted to hospital at least twice or with at least four contracts with outpatient or primary healthcare during the previous 12 months; being able to communicate verbally and have not cognitive impairments (i.e. ≥25 MMSE) | 12 months           | TUG test        |

|                               |     |                                                      |                    |                                                                                                                                                                              |                                                                                                                                                                     |              |                                |
|-------------------------------|-----|------------------------------------------------------|--------------------|------------------------------------------------------------------------------------------------------------------------------------------------------------------------------|---------------------------------------------------------------------------------------------------------------------------------------------------------------------|--------------|--------------------------------|
| Pai et al., 2010 [39]         | 13  | ≥65 (65-85, 72 (SD 5))                               | 9 men/ 4 women     | musculoskeletal, neurological, cognitive or other systemic disorders, osteopenic or osteoporotic, cognitive impairment, symptomatic postural hypotension                     | ambulatory community dwelling elderly                                                                                                                               | 29-32 months | TUG test                       |
| Russell et al., 2008 [40]     | 344 | ≥60 (75.9 (SD 8.5))                                  | 106 men/ 238 women | n.a.                                                                                                                                                                         | community dwelling elderly aged ≥60 presented to an ED as a result of a fall being directly discharged home following emergency care and able to walk independently | 12 months    | TUG test<br>FR test            |
| Tiedemann et al., 2010 [56]   | 362 | ≥74 (74-98, 80.25 (SD=4.5))                          | 128 men/ 234 women | blindness, minimal English language skills, and cognitive impairment                                                                                                         | community dwelling elderly aged 63-95 resided in Sydney, Australia                                                                                                  | 12 months    | Fall history                   |
| Trueblood et al., 2001 [41]   | 180 | ≥60 (60-96, 77.9 (SD 7.26))                          | 37 men/ 143 women  | cognitive deficits, underlying neurological problems                                                                                                                         | aged ≥60, able to stand for 5 min. without aid, able to walk 40 feet at one time without aid.                                                                       | 6 months     | TUG test<br>POMA-B<br>POMA-G   |
| Tsutomimoto et al., 2013 [45] | 59  | ≥65 (Non-fallers 84.0 (SD 1.1) 85.5 (SD 1.4))        | 11 men/ 48 women   | very severe cardiac, pulmonary, musculoskeletal, or neuropathological disorders associated with inability to step safely, cognitive impairment                               | community-dwelling older people receiving long-term care services aged ≥65, able to walk independently, and having adequate hearing and vision                      | 12 months    | Gait speed test (4m)           |
| Vergheze et al., 2002 [46]    | 59  | ≥65 (Nonfallers 79.7 (SD 6.6) Fallers 79.4 (SD 5.7)) | 25 men/ 34 women   | severe visual loss interfering with completion of neuropsychological tests, non-English or non-Spanish speaking, institutionalization, healthy enough to make a clinic visit | community dwelling elderly aged ≥65                                                                                                                                 | 12 months    | Gait speed test (4m)<br>POMA-B |

|                           |    |                        |                     |                                                                                                                                                                                                                                                                                                                                                                                                                                                                                                                                           |                                                                                      |          |          |
|---------------------------|----|------------------------|---------------------|-------------------------------------------------------------------------------------------------------------------------------------------------------------------------------------------------------------------------------------------------------------------------------------------------------------------------------------------------------------------------------------------------------------------------------------------------------------------------------------------------------------------------------------------|--------------------------------------------------------------------------------------|----------|----------|
| Wrisley et al., 2010 [42] | 35 | 60-90 (72..9 (SD 7.8)) | 17 men/<br>18 women | cognitive impairment, history of osteoporosis, recent fractures, or lower-extremity surgery; history of progressive neuromuscular disorder; history of whiplash, neck injury, or current complaints of neck pain; history of unstable angina or uncontrolled cardiorespiratory problems; taking any medications that might affect balance; history of any fall in past 6 months and more than one fall in the last year; pain in any segment greater than 2/10 on a 10-point verbal analog scale; not returning the monthly fall calendar | community dwelling elderly aged 60-90 able to stand independently longer than 1 min. | 6 months | TUG test |
|---------------------------|----|------------------------|---------------------|-------------------------------------------------------------------------------------------------------------------------------------------------------------------------------------------------------------------------------------------------------------------------------------------------------------------------------------------------------------------------------------------------------------------------------------------------------------------------------------------------------------------------------------------|--------------------------------------------------------------------------------------|----------|----------|

<sup>1</sup> range, mean, SD: only described when reported in included article

<sup>2</sup> TUG test: Timed Get Up and Go test

POMA- B: Performance Oriented Mobility Assessment –Balance

POMA-G: Performance Oriented Mobility Assessment –Gait

BBS: Berg Balance Scale

FR test: Functional Reach test
